# Supplementary material for: Maltodextrin-Coated Peppermint and Caraway Essential Oils Effects on Soil Microbiota
Source: MDPI journal article supplement (doi:10.3390/plants11233343), 2022-12-02
Supplement: s1 [file s1]

Table S1. Mean values [in millions], standard deviations and Fisher's least significant differences (LSDs) for bacteria

| Soil                |              | Loamy soil                                                                                          |       | Sandy soil |       | Average |       |
|---------------------|--------------|-----------------------------------------------------------------------------------------------------|-------|------------|-------|---------|-------|
| Day                 | Microcapsule | Mean                                                                                                | s.d.  | Mean       | s.d.  | Mean    | s.d.  |
| 1                   | Control      | 6.22                                                                                                | 3.82  | 3.86       | 2.12  | 5.04    | 3.05  |
|                     | M1           | 10.13                                                                                               | 4.29  | 2.18       | 1.02  | 6.16    | 5.17  |
|                     | M2           | 4.98                                                                                                | 0.83  | 5.54       | 2.11  | 5.26    | 1.47  |
|                     | CrOM1        | 6.38                                                                                                | 4.83  | 13.48      | 11.7  | 9.93    | 8.9   |
|                     | CrOM2        | 3.46                                                                                                | 1.6   | 1.9        | 1.49  | 2.68    | 1.63  |
|                     | PmOM1        | 5.84                                                                                                | 0.54  | 4.09       | 4.43  | 4.96    | 2.98  |
|                     | PmOM2        | 4.58                                                                                                | 1.48  | 2.17       | 1.05  | 3.37    | 1.75  |
| 7                   | Control      | 10.43                                                                                               | 7.62  | 4.1        | 1.03  | 7.27    | 5.97  |
|                     | M1           | 10.49                                                                                               | 4.57  | 18.25      | 15.54 | 14.37   | 11.09 |
|                     | M2           | 21.31                                                                                               | 12.96 | 13.29      | 8.32  | 17.3    | 10.69 |
|                     | CrOM1        | 19.93                                                                                               | 11.58 | 18.11      | 13.54 | 19.02   | 11.31 |
|                     | CrOM2        | 2.29                                                                                                | 1.53  | 2.23       | 1.48  | 2.26    | 1.35  |
|                     | PmOM1        | 30.2                                                                                                | 3.43  | 45.56      | 21.54 | 37.88   | 16.16 |
|                     | PmOM2        | 24.88                                                                                               | 12.53 | 14.62      | 5.27  | 19.75   | 10.27 |
| 14                  | Control      | 2.14                                                                                                | 0.18  | 7.44       | 0.66  | 4.79    | 2.93  |
|                     | M1           | 13.24                                                                                               | 7.96  | 22.59      | 8.65  | 17.91   | 9.03  |
|                     | M2           | 45.88                                                                                               | 17.34 | 61.36      | 34.67 | 53.62   | 25.94 |
|                     | CrOM1        | 0.84                                                                                                | 0.36  | 13.46      | 3.47  | 7.15    | 7.26  |
|                     | CrOM2        | 43.81                                                                                               | 17.69 | 32.42      | 19.08 | 38.11   | 17.6  |
|                     | PmOM1        | 63.34                                                                                               | 42.01 | 11.88      | 7.05  | 37.61   | 38.99 |
|                     | PmOM2        | 35.58                                                                                               | 15.49 | 41.14      | 21.67 | 38.36   | 17.12 |
| 78                  | Control      | 9.75                                                                                                | 3.73  | 7.29       | 2.74  | 8.52    | 3.22  |
|                     | M1           | 19.24                                                                                               | 4.23  | 11.78      | 5.82  | 15.51   | 6.12  |
|                     | M2           | 20.77                                                                                               | 7.65  | 41.66      | 29.47 | 31.21   | 22.4  |
|                     | CrOM1        | 23.01                                                                                               | 6.81  | 14.93      | 1.08  | 18.97   | 6.22  |
|                     | CrOM2        | 73.63                                                                                               | 65.69 | 15.09      | 9.3   | 44.36   | 52.81 |
|                     | PmOM1        | 25.4                                                                                                | 11.06 | 7.47       | 1.02  | 16.44   | 12.07 |
|                     | PmOM2        | 37.78                                                                                               | 17.46 | 127.75     | 83.95 | 82.77   | 73.27 |
| Control             |              | 7.13                                                                                                | 5.25  | 5.67       | 2.36  |         |       |
| M1                  |              | 13.28                                                                                               | 6.04  | 13.7       | 11.33 |         |       |
| M2                  |              | 23.24                                                                                               | 18.15 | 30.46      | 30.57 |         |       |
| CrOM1               |              | 12.54                                                                                               | 11.38 | 14.99      | 8.03  |         |       |
| CrOM2               |              | 30.8                                                                                                | 42.6  | 12.91      | 15.88 |         |       |
| PmOM1               |              | 31.19                                                                                               | 28.49 | 17.25      | 19.92 |         |       |
| PmOM2               |              | 25.7                                                                                                | 17.78 | 46.42      | 63.19 |         |       |
| Day 1               |              | 5.94                                                                                                | 3.2   | 4.74       | 5.65  |         |       |
| Day 7               |              | 17.08                                                                                               | 11.83 | 16.59      | 16.8  |         |       |
| Day 14              |              | 29.26                                                                                               | 28.13 | 27.18      | 23.47 |         |       |
| Day 78              |              | 29.94                                                                                               | 29.75 | 32.28      | 50.24 |         |       |
| LSD <sub>0.05</sub> |              | Day (D): 8.08; Microcapsule (M): 10.69; Soil (S): 5.71; DM: 21.38; DS: 11.43; MS: 15.11; DMS: 30.23 |       |            |       |         |       |

Table S2. Mean values [in thousands], standard deviations and Fisher's least significant differences (LSDs) for fungi

| Soil                |              | Loamy soil                                                                                            |        | Sandy soil |       | Average |        |
|---------------------|--------------|-------------------------------------------------------------------------------------------------------|--------|------------|-------|---------|--------|
| Day                 | Microcapsule | Mean                                                                                                  | s.d.   | Mean       | s.d.  | Mean    | s.d.   |
| 1                   | Control      | 3.65                                                                                                  | 0.9    | 34.31      | 11.99 | 18.98   | 18.43  |
|                     | M1           | 40.68                                                                                                 | 21.45  | 11.74      | 7.69  | 26.21   | 21.42  |
|                     | M2           | 4.91                                                                                                  | 3.06   | 36.41      | 28.42 | 20.66   | 24.99  |
|                     | CrOM1        | 21.81                                                                                                 | 17.15  | 26.75      | 4.71  | 24.28   | 11.57  |
|                     | CrOM2        | 27.89                                                                                                 | 6.02   | 6.55       | 3.91  | 17.22   | 12.54  |
|                     | PmOM1        | 4.27                                                                                                  | 1.07   | 5.15       | 4.49  | 4.71    | 2.96   |
|                     | PmOM2        | 5.94                                                                                                  | 0.61   | 3.06       | 1.08  | 4.5     | 1.76   |
| 7                   | Control      | 85.95                                                                                                 | 54.35  | 28.38      | 20.17 | 57.17   | 48.35  |
|                     | M1           | 158.45                                                                                                | 84.16  | 47.19      | 17.48 | 102.82  | 81.67  |
|                     | M2           | 22.08                                                                                                 | 17.37  | 0          | 0     | 11.04   | 16.34  |
|                     | CrOM1        | 83.65                                                                                                 | 47.17  | 101.84     | 56.18 | 92.75   | 47.46  |
|                     | CrOM2        | 8.47                                                                                                  | 3.67   | 0.34       | 0.59  | 4.4     | 5.03   |
|                     | PmOM1        | 56.12                                                                                                 | 23.38  | 57.98      | 31.9  | 57.05   | 25.03  |
|                     | PmOM2        | 33.24                                                                                                 | 8.08   | 0          | 0     | 16.62   | 18.91  |
| 14                  | Control      | 5.29                                                                                                  | 5.29   | 27.97      | 14.52 | 16.63   | 15.81  |
|                     | M1           | 342.01                                                                                                | 267.76 | 55.96      | 31.48 | 198.99  | 231.56 |
|                     | M2           | 10.16                                                                                                 | 0.61   | 0.07       | 0.12  | 5.11    | 5.54   |
|                     | CrOM1        | 49.77                                                                                                 | 20.67  | 10.72      | 9.62  | 30.24   | 25.79  |
|                     | CrOM2        | 21.78                                                                                                 | 17.68  | 5.82       | 1.57  | 13.8    | 14.23  |
|                     | PmOM1        | 44.92                                                                                                 | 45.77  | 85.56      | 61.87 | 65.24   | 53.52  |
|                     | PmOM2        | 137.44                                                                                                | 70.08  | 0.34       | 0.59  | 68.89   | 87.2   |
| 78                  | Control      | 24.46                                                                                                 | 8.02   | 18.28      | 15.49 | 21.37   | 11.54  |
|                     | M1           | 140.08                                                                                                | 98.56  | 10.67      | 14.57 | 75.37   | 94.84  |
|                     | M2           | 15.22                                                                                                 | 16.93  | 21.51      | 18.63 | 18.36   | 16.29  |
|                     | CrOM1        | 159.2                                                                                                 | 95.18  | 36.06      | 33.75 | 97.63   | 92.88  |
|                     | CrOM2        | 164.86                                                                                                | 57.11  | 9.72       | 7.31  | 87.29   | 92.44  |
|                     | PmOM1        | 81.49                                                                                                 | 59.59  | 27.9       | 14.16 | 54.69   | 48.6   |
|                     | PmOM2        | 56.93                                                                                                 | 56.27  | 0.25       | 0.43  | 28.59   | 47.23  |
|                     | Control      | 29.84                                                                                                 | 42.09  | 27.24      | 14.77 |         |        |
|                     | M1           | 170.3                                                                                                 | 170.54 | 31.39      | 27.21 |         |        |
|                     | M2           | 13.09                                                                                                 | 12.35  | 14.5       | 21.64 |         |        |
|                     | CrOM1        | 78.61                                                                                                 | 71.19  | 43.84      | 45.99 |         |        |
|                     | CrOM2        | 55.75                                                                                                 | 71     | 5.61       | 5.04  |         |        |
|                     | PmOM1        | 46.7                                                                                                  | 44.41  | 44.15      | 43.91 |         |        |
|                     | PmOM2        | 58.38                                                                                                 | 64.1   | 0.91       | 1.42  |         |        |
|                     | Day 1        | 15.59                                                                                                 | 16.58  | 17.71      | 17.11 |         |        |
|                     | Day 7        | 63.99                                                                                                 | 60.54  | 33.68      | 42.58 |         |        |
|                     | Day 14       | 87.34                                                                                                 | 145.2  | 26.64      | 38.41 |         |        |
|                     | Day 78       | 91.75                                                                                                 | 80.62  | 17.77      | 18.71 |         |        |
| LSD <sub>0.05</sub> |              | Day (D): 21.29; Microcapsule (M): 28.17; Soil (S): 15.06; DM: 56.34; DS: 30.11; MS: 39.84; DMS: 79.68 |        |            |       |         |        |

Table S3. Mean values [in millions], standard deviations and Fisher's least significant differences (LSDs) for actinomycetes

| Soil                |              | Loamy soil                                                                                             |        | Sandy soil |        | Average |        |
|---------------------|--------------|--------------------------------------------------------------------------------------------------------|--------|------------|--------|---------|--------|
| Day                 | Microcapsule | Mean                                                                                                   | s.d.   | Mean       | s.d.   | Mean    | s.d.   |
| 1                   | Control      | 15.39                                                                                                  | 5.54   | 5.02       | 2.2    | 10.2    | 6.82   |
|                     | M1           | 11.59                                                                                                  | 3.64   | 22.67      | 9.85   | 17.13   | 9      |
|                     | M2           | 24.77                                                                                                  | 23.37  | 10.92      | 8      | 17.85   | 17.37  |
|                     | CrOM1        | 9.16                                                                                                   | 2.66   | 39.78      | 22     | 24.47   | 21.86  |
|                     | CrOM2        | 6                                                                                                      | 1.22   | 11.44      | 4.65   | 8.72    | 4.26   |
|                     | PmOM1        | 5.59                                                                                                   | 5.08   | 12.81      | 10.88  | 9.2     | 8.56   |
|                     | PmOM2        | 5.97                                                                                                   | 0.54   | 1.44       | 0.71   | 3.71    | 2.54   |
| 7                   | Control      | 16.45                                                                                                  | 4.14   | 2.84       | 1.71   | 9.64    | 7.97   |
|                     | M1           | 34.28                                                                                                  | 44     | 48.53      | 27.22  | 41.4    | 33.64  |
|                     | M2           | 27.55                                                                                                  | 24.19  | 24.38      | 4.01   | 25.97   | 15.6   |
|                     | CrOM1        | 27.48                                                                                                  | 9.55   | 34.36      | 8.57   | 30.92   | 8.95   |
|                     | CrOM2        | 355.92                                                                                                 | 518.89 | 9.63       | 2.54   | 182.77  | 379.05 |
|                     | PmOM1        | 111.9                                                                                                  | 85.85  | 88.52      | 56.12  | 100.21  | 66.12  |
|                     | PmOM2        | 21.48                                                                                                  | 16.19  | 55.37      | 77.23  | 38.43   | 53.25  |
| 14                  | Control      | 3.9                                                                                                    | 0.69   | 4.37       | 2.1    | 4.13    | 1.42   |
|                     | M1           | 31.26                                                                                                  | 11.8   | 36.45      | 5.74   | 33.85   | 8.77   |
|                     | M2           | 27.42                                                                                                  | 6.72   | 51.08      | 23.95  | 39.25   | 20.38  |
|                     | CrOM1        | 0.7                                                                                                    | 0.32   | 83.07      | 123.86 | 41.89   | 90.4   |
|                     | CrOM2        | 36.27                                                                                                  | 14.54  | 14.38      | 4.71   | 25.32   | 15.4   |
|                     | PmOM1        | 57.19                                                                                                  | 42.58  | 15.92      | 7.77   | 36.56   | 35.5   |
|                     | PmOM2        | 30.77                                                                                                  | 9.26   | 15.33      | 5.76   | 23.05   | 10.91  |
| 78                  | Control      | 6.45                                                                                                   | 5.1    | 3.77       | 1.37   | 5.11    | 3.65   |
|                     | M1           | 17.47                                                                                                  | 3.04   | 18.1       | 6.63   | 17.79   | 4.62   |
|                     | M2           | 32.9                                                                                                   | 10.92  | 39.83      | 16     | 36.36   | 12.82  |
|                     | CrOM1        | 41.88                                                                                                  | 19.35  | 13.57      | 8.59   | 27.72   | 20.49  |
|                     | CrOM2        | 62.64                                                                                                  | 36.73  | 55.77      | 63.49  | 59.21   | 46.54  |
|                     | PmOM1        | 36.75                                                                                                  | 17.74  | 12.83      | 2.2    | 24.79   | 17.3   |
|                     | PmOM2        | 65.05                                                                                                  | 41.7   | 101.14     | 60.59  | 83.1    | 50.55  |
|                     | Control      | 10.55                                                                                                  | 6.79   | 4          | 1.8    |         |        |
|                     | M1           | 23.65                                                                                                  | 21.86  | 31.44      | 17.95  |         |        |
|                     | M2           | 28.16                                                                                                  | 15.65  | 31.55      | 20.45  |         |        |
|                     | CrOM1        | 19.81                                                                                                  | 19.11  | 42.69      | 60.01  |         |        |
|                     | CrOM2        | 115.21                                                                                                 | 265.98 | 22.8       | 33.77  |         |        |
|                     | PmOM1        | 52.86                                                                                                  | 58.03  | 32.52      | 41.81  |         |        |
|                     | PmOM2        | 30.82                                                                                                  | 29.85  | 43.32      | 58.32  |         |        |
|                     | Day 1        | 11.21                                                                                                  | 10.31  | 14.87      | 15.09  |         |        |
|                     | Day 7        | 85.01                                                                                                  | 204.34 | 37.66      | 42.14  |         |        |
|                     | Day 14       | 26.79                                                                                                  | 23.83  | 31.51      | 47.93  |         |        |
|                     | Day 78       | 37.59                                                                                                  | 28.51  | 35         | 43.18  |         |        |
| LSD <sub>0.05</sub> |              | Day (D): 32.75; Microcapsule (M): 43.32; Soil (S): 23.16; DM: 86.64; DS: 46.31; MS: 61.27; DMS: 122.53 |        |            |        |         |        |
